# Supplementary material for: Interplay between conformational selection and zymogen activation
Source: PubMed Central journal article supplement (PMC5840343; doi:10.1038/s41598-018-21728-9), 2018-03-06

## **Supplementary Materials**

### **Interplay between conformational selection and zymogen activation**

**Pradipta Chakraborty, Laura Acquasaliente, Leslie A. Pelc and Enrico Di Cera**

Edward A. Doisy Department of Biochemistry and Molecular Biology, Saint Louis University School of Medicine, St. Louis, MO 63104 USA

Kinetic traces and residuals for thrombin, meizothrombin, prothrombin, prethrombin-1 and prethrombin-2 whose values of  $k_{\text{obs}}$  are shown in Figures 2 and 3.

Raw gels shown in Figures 5 and 6.

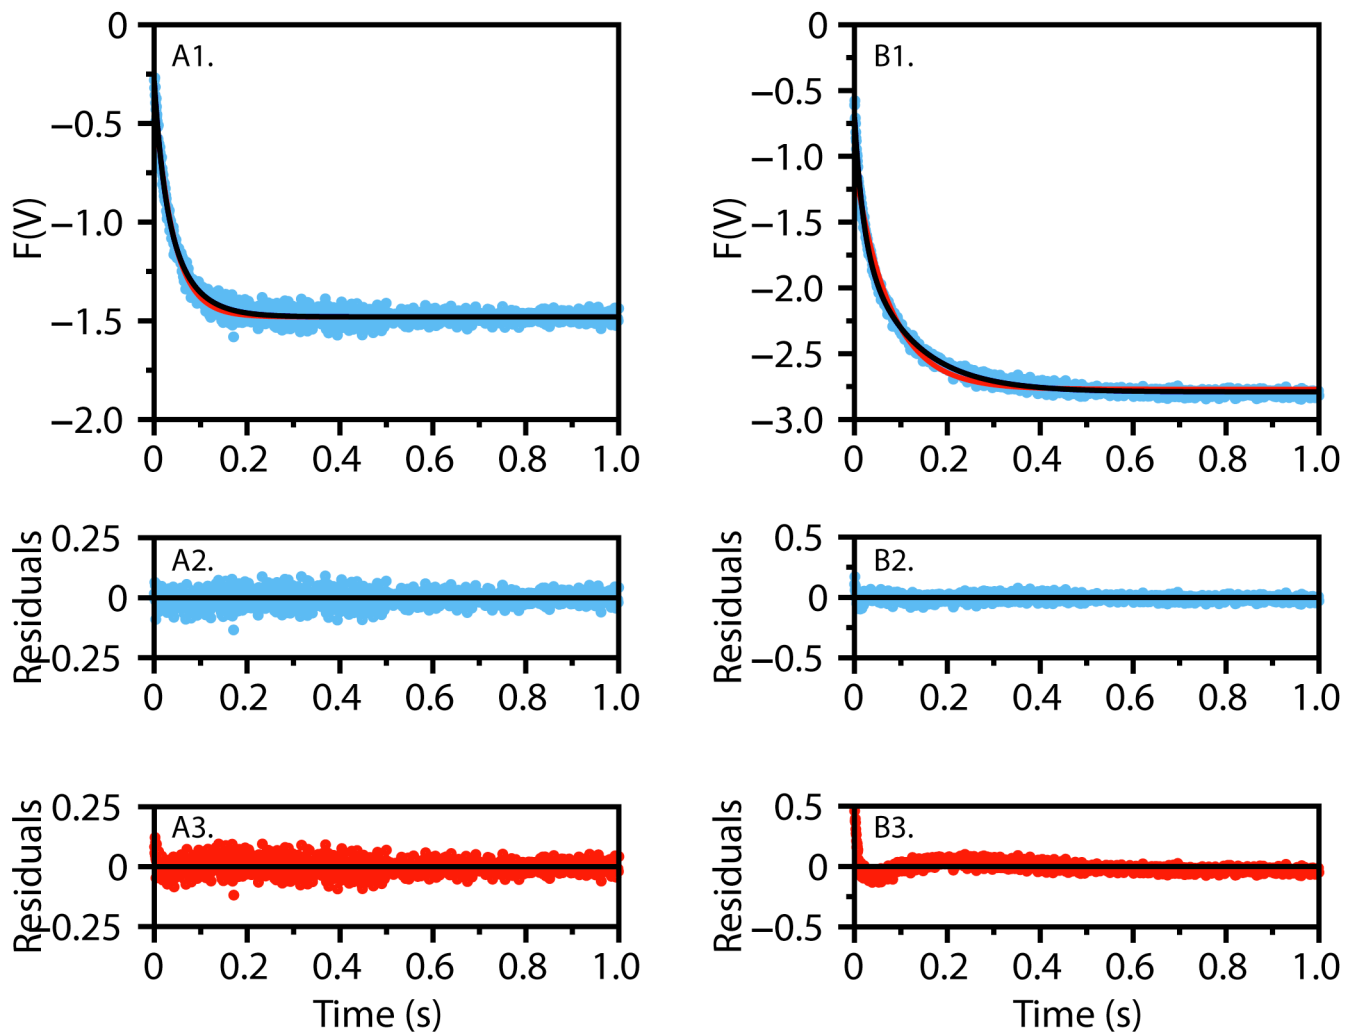

FPR (15  $\mu\text{M}$ ) binding to thrombin (A1) or meizothrombin (B1) fit to single (red) or double (black) exponential relaxations with resulting residuals (A2, B2=double-exponential fit, A3, B3=single exponential fit).

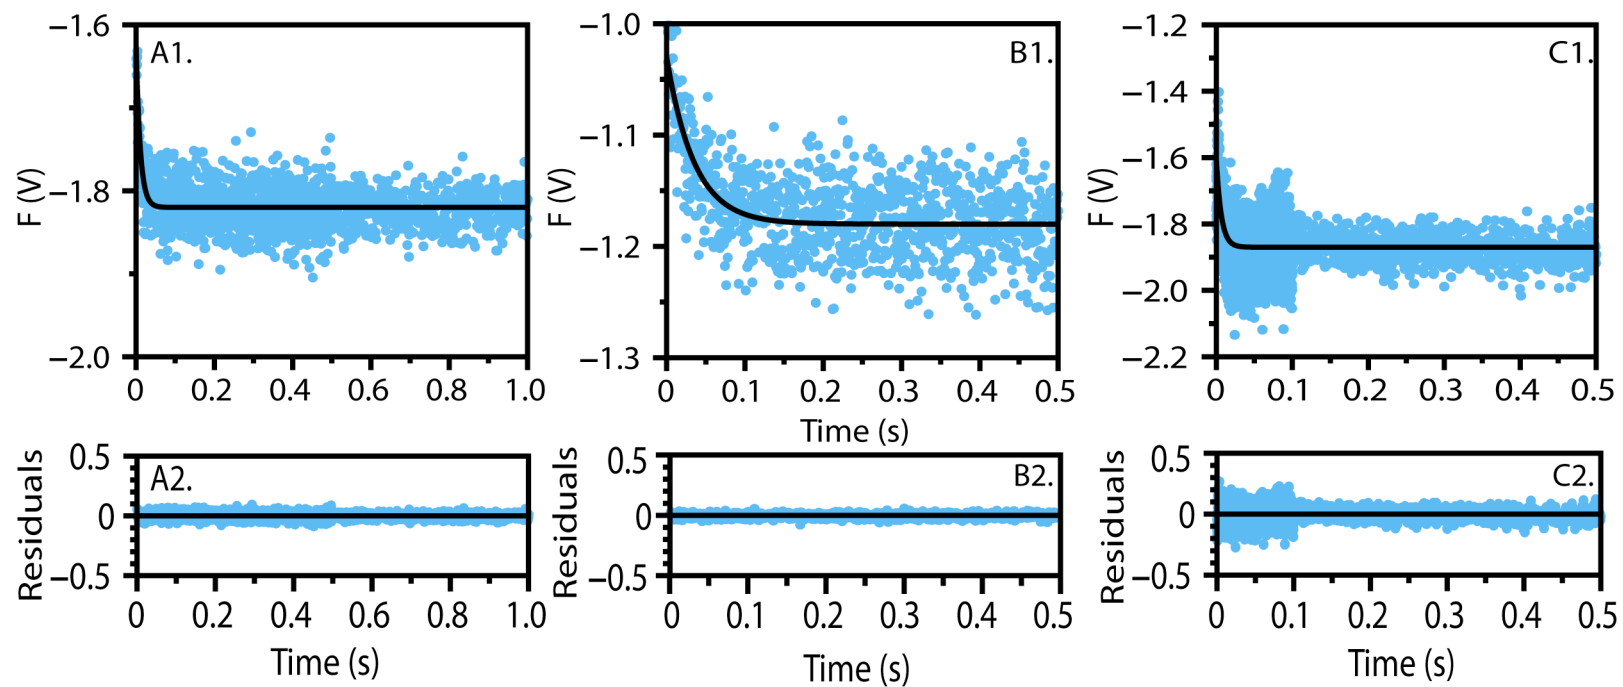

FPR ( $320 \mu\text{M}$ ) binding to prothrombin (A1), prethrombin-1 (B1) or prethrombin-2 (C1) fit to a single exponential relaxation with resulting residuals (A2, B2, C2).

Figure 5\_raw gels

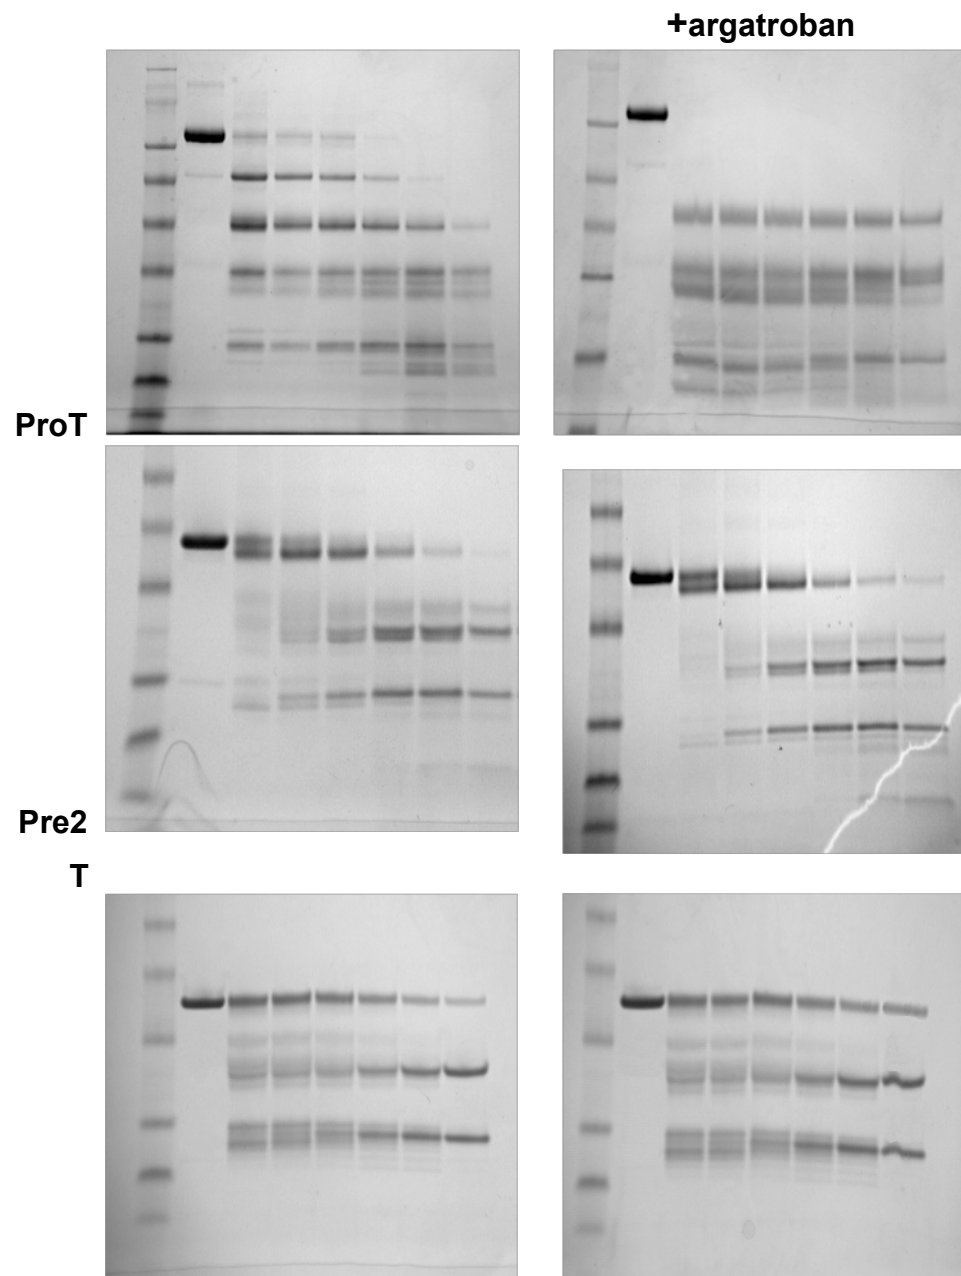

Figure 6\_raw gels

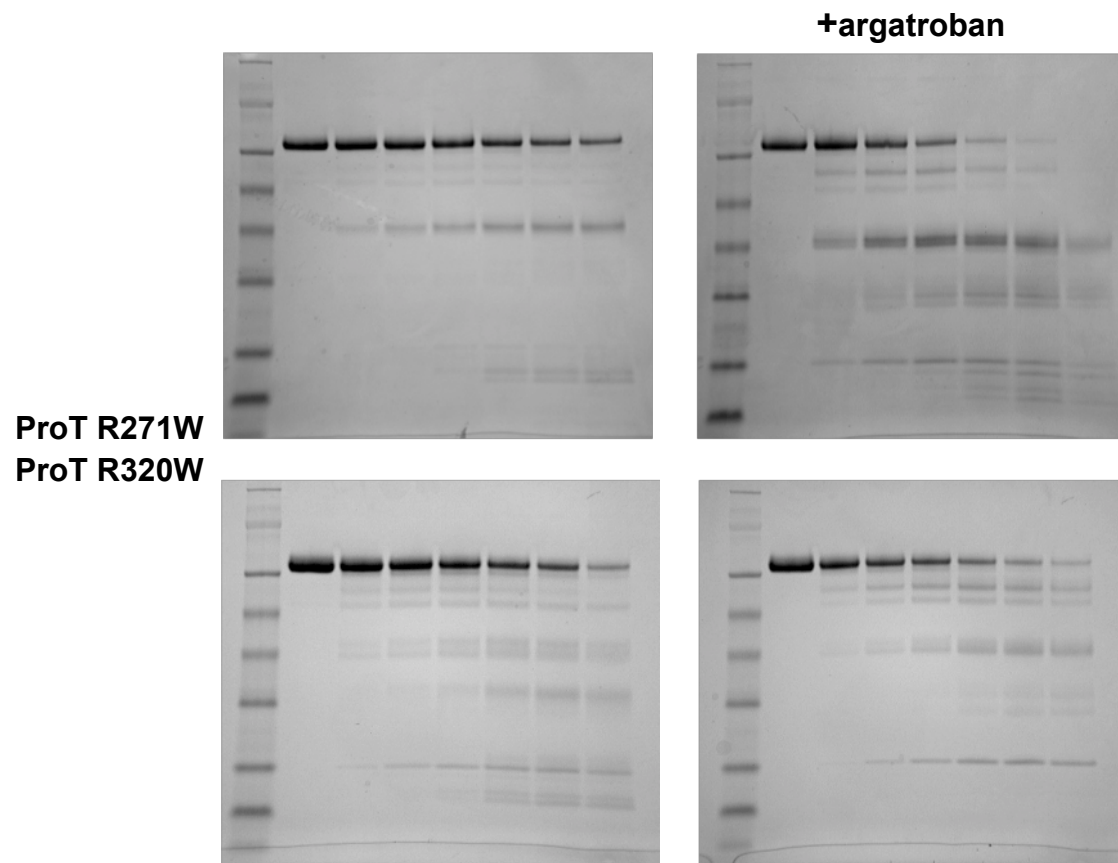

Supplement: 41598_2018_21728_MOESM1_ESM.pdf [file 41598_2018_21728_MOESM1_ESM.pdf]
